# Supplementary material for: Treatment Effects of Jinlingzi Powder and Its Extractive Components on Gastric Ulcer Induced by Acetic Acid in Rats
Source: Hindawi journal article supplement (doi:10.1155/2019/7365841), 2019-01-03
Supplement: f1 [file 7365841.f1.pdf]

## Supplementary Information

### Treatment Effects of Jinlingzi Powder and its Extractive Components on Gastric Ulcer Induced by Acetic Acid in Rats

Xueying Zhao\*, Ji Li, Yonghai Meng, Mingming Cao, Jianwei Wang\*

School of Basic Medical Sciences, Heilongjiang University of Chinese Medicine, 24 Heping Road, Harbin, 150040, China

Table S1 effect of different groups on UI, UA and UHR

| Group | Number of rats | UI                         | UA (cm <sup>2</sup> )     | UHR (%) |
|-------|----------------|----------------------------|---------------------------|---------|
| BG    | 12             | 0                          | 0                         | —       |
| MG    | 9              | 0.911±0.166                | 0.146±0.060               | —       |
| JG    | 10             | 0.417±0.089 <sup>##</sup>  | 0.030±0.015 <sup>b</sup>  | 69.5    |
| OG    | 11             | 0.400±0.082 <sup>##</sup>  | 0.027±0.011 <sup>b</sup>  | 70.7    |
| C3G   | 9              | 0.738±0.076 <sup>***</sup> | 0.100±0.072 <sup>ad</sup> | 28.1    |
| C2G   | 10             | 0.450±0.096 <sup>##</sup>  | 0.037±0.017 <sup>b</sup>  | 67.1    |
| C1G   | 10             | 0.544±0.096 <sup>##*</sup> | 0.049±0.019 <sup>bc</sup> | 40.2    |

The results are expressed as the means ± SD. #  $P < 0.05$  vs MG, ##  $P < 0.01$  vs MG, \*  $P < 0.05$  vs JG, \*\*  $P < 0.01$  vs JG. (UI: ulcer index, UA: ulcer area, UHR: ulcer healing rate)

Table S2 contents of IL-8, TNF- $\alpha$ , NT, PAF and TXB2 in rat serum ( $\bar{x} \pm s$ )

| Group | Number of rats | IL-8 (pg/mL)                      | TNF- $\alpha$ (pg/mL)                | NT (pg/mL)                          | PAF (pg/mL)                          | TXB2 (pg/mL)                       |
|-------|----------------|-----------------------------------|--------------------------------------|-------------------------------------|--------------------------------------|------------------------------------|
| BG    | 12             | 8.75 $\pm$ 2.78 <sup>##</sup>     | 379.65 $\pm$ 11.11 <sup>##</sup>     | 178.19 $\pm$ 11.24 <sup>##</sup>    | 519.29 $\pm$ 30.97 <sup>##</sup>     | 22.23 $\pm$ 4.48 <sup>##</sup>     |
| MG    | 9              | 23.66 $\pm$ 6.404 <sup>**++</sup> | 451.36 $\pm$ 25.47 <sup>***++</sup>  | 88.10 $\pm$ 12.20 <sup>**++</sup>   | 651.18 $\pm$ 49.39 <sup>**++</sup>   | 68.52 $\pm$ 8.93 <sup>**++</sup>   |
| JG    | 10             | 11.69 $\pm$ 3.09 <sup>##</sup>    | 391.95 $\pm$ 15.33 <sup>##</sup>     | 173.99 $\pm$ 9.58 <sup>##</sup>     | 531.41 $\pm$ 14.33 <sup>##</sup>     | 25.15 $\pm$ 3.69 <sup>##</sup>     |
| OG    | 11             | 12.91 $\pm$ 3.51 <sup>##*</sup>   | 425.43 $\pm$ 14.39 <sup>##**++</sup> | 132.49 $\pm$ 7.97 <sup>##**++</sup> | 553.07 $\pm$ 44.72 <sup>##</sup>     | 30.00 $\pm$ 7.64 <sup>**</sup>     |
| C3G   | 9              | 13.91 $\pm$ 4.36 <sup>##*</sup>   | 407.06 $\pm$ 18.26 <sup>##*</sup>    | 170.66 $\pm$ 10.71 <sup>##</sup>    | 544.46 $\pm$ 34.02 <sup>##</sup>     | 53.17 $\pm$ 6.92 <sup>**++</sup>   |
| C2G   | 10             | 11.26 $\pm$ 1.92 <sup>##</sup>    | 410.06 $\pm$ 7.25 <sup>##**</sup>    | 168.13 $\pm$ 18.90 <sup>##</sup>    | 538.62 $\pm$ 26.56 <sup>##</sup>     | 28.77 $\pm$ 6.30 <sup>##</sup>     |
| C1G   | 10             | 17.71 $\pm$ 4.89 <sup>**++</sup>  | 431.43 $\pm$ 12.95 <sup>##**++</sup> | 91.72 $\pm$ 8.68 <sup>**++</sup>    | 610.62 $\pm$ 26.88 <sup>##**++</sup> | 49.02 $\pm$ 3.41 <sup>##**++</sup> |

The results are expressed as the means  $\pm$  SD. <sup>#</sup>  $P < 0.05$  vs MG, <sup>##</sup>  $P < 0.01$  vs MG, <sup>\*</sup>  $P < 0.05$  vs BG, <sup>\*\*</sup>  $P < 0.01$  vs BG, <sup>+</sup>  $P < 0.05$  vs JG, <sup>++</sup>  $P < 0.01$  vs JG. IL-8: interleukin-8, TNF- $\alpha$ : tumor necrosis factor- $\alpha$ , NT: neurotensin, PAF: platelet activating factor, TXB2: thromboxane B2.

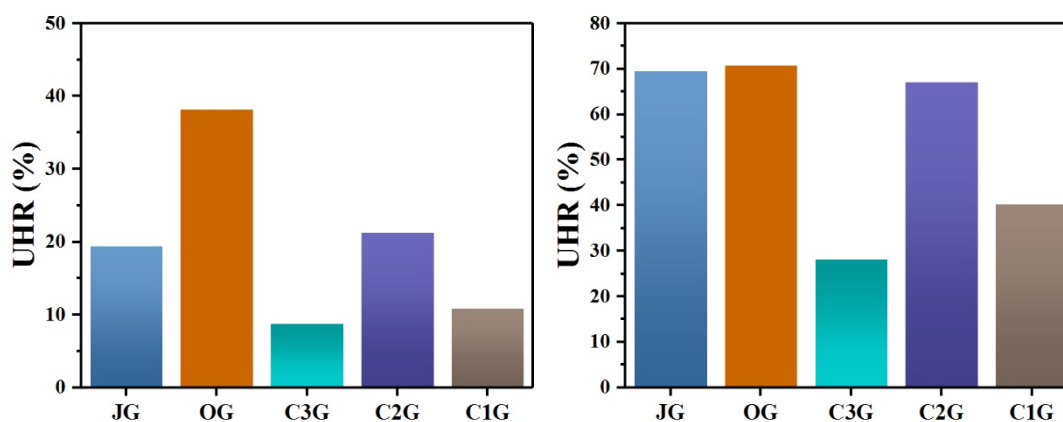

Fig. S1 UHR on the gastric ulcer of pyloric ligation type (left) and acetic acid smear type (right) over Jinlingzi Powder and its components (Ten rats in each group)
